# Supplementary material for: Using internal standards in time-resolved X-ray micro-computed tomography to quantify grain-scale developments in solid-state mineral reactions
Source: Copernicus journal article supplement (doi:10.5194/se-15-493-2024), 2024-04-09
Supplement: Supplementary file 1 [file se-15-493-2024-supplement.pdf]

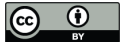

*Supplement of*

## **Using internal standards in time-resolved X-ray micro-computed tomography to quantify grain-scale developments in solid-state mineral reactions**

**Roberto Emanuele Rizzo et al.**

*Correspondence to:* Roberto Emanuele Rizzo ([robertoemanuele.rizzo@unifi.it](mailto:robertoemanuele.rizzo@unifi.it), [robertoemanuele.rizzo@gmail.com](mailto:robertoemanuele.rizzo@gmail.com))

The copyright of individual parts of the supplement might differ from the article licence.

Table S1

| Evaluation Metrics    | Average                          |                                     |                                   |                                                |                                               |                                                | Gypsum                           |                                     |                                   |                                                |                                               |                                                | Bassanite                        |                                     |                                   |                                                |                                               |                                                |
|-----------------------|----------------------------------|-------------------------------------|-----------------------------------|------------------------------------------------|-----------------------------------------------|------------------------------------------------|----------------------------------|-------------------------------------|-----------------------------------|------------------------------------------------|-----------------------------------------------|------------------------------------------------|----------------------------------|-------------------------------------|-----------------------------------|------------------------------------------------|-----------------------------------------------|------------------------------------------------|
|                       | Model A                          | Model B                             | Model C                           | Model D                                        | Model E                                       | Model RF                                       | Model A                          | Model B                             | Model C                           | Model D                                        | Model E                                       | Model RF                                       | Model A                          | Model B                             | Model C                           | Model D                                        | Model E                                       | Model RF                                       |
|                       | Patch=16<br>Stride=1<br>Batch=64 | Patch=16<br>Stride=0.5<br>Batch=128 | Patch=16<br>Stride=1<br>Batch=128 | Patch=16<br>Stride=1<br>Batch=128<br>Data Aug. | Patch=16<br>Stride=1<br>Batch=64<br>Data Aug. | Patch=16<br>Stride=1<br>Batch=512<br>Data Aug. | Patch=16<br>Stride=1<br>Batch=64 | Patch=16<br>Stride=0.5<br>Batch=128 | Patch=16<br>Stride=1<br>Batch=128 | Patch=16<br>Stride=1<br>Batch=128<br>Data Aug. | Patch=16<br>Stride=1<br>Batch=64<br>Data Aug. | Patch=16<br>Stride=1<br>Batch=512<br>Data Aug. | Patch=16<br>Stride=1<br>Batch=64 | Patch=16<br>Stride=0.5<br>Batch=128 | Patch=16<br>Stride=1<br>Batch=128 | Patch=16<br>Stride=1<br>Batch=128<br>Data Aug. | Patch=16<br>Stride=1<br>Batch=64<br>Data Aug. | Patch=16<br>Stride=1<br>Batch=512<br>Data Aug. |
| RECALL                | 0.0130                           | 0.0210                              | 0.095                             | 0.0882                                         | 0.966                                         | 0.961                                          | 0.034                            | 0.338                               | 0.642                             | 0.390                                          | 0.996                                         | 0.990                                          | 0.000                            | 0.000                               | 0.046                             | 0.000                                          | 0.790                                         | 0.990                                          |
| SPECIFICITY           | 0.6715                           | 0.6907                              | 0.699                             | 0.6964                                         | 0.987                                         | 0.987                                          | 0.881                            | 0.117                               | 0.999                             | 1.000                                          | 0.863                                         | 0.929                                          | 0.668                            | 0.801                               | 0.393                             | 0.990                                          | 0.989                                         | 0.929                                          |
| ACCURACY              | 0.5076                           | 0.5240                              | 0.548                             | 0.5451                                         | 0.982                                         | 0.981                                          | 0.778                            | 0.129                               | 0.998                             | 0.998                                          | 0.971                                         | 0.971                                          | 0.124                            | 0.148                               | 0.110                             | 0.183                                          | 0.965                                         | 0.971                                          |
| DICE                  | 0.0130                           | 0.0214                              | 0.095                             | 0.0880                                         | 0.964                                         | 0.961                                          | 0.035                            | 0.041                               | 0.651                             | 0.546                                          | 0.983                                         | 0.979                                          | 0.001                            | 0.000                               | 0.077                             | 0.000                                          | 0.845                                         | 0.979                                          |
| IoU                   | 0.0065                           | 0.0108                              | 0.050                             | 0.0460                                         | 0.931                                         | 0.925                                          | 0.018                            | 0.021                               | 0.483                             | 0.375                                          | 0.966                                         | 0.958                                          | 0.000                            | 0.000                               | 0.040                             | 0.000                                          | 0.731                                         | 0.958                                          |
| VOLUMETRIC SIMILARITY | 0.9977                           | 0.9768                              | 0.998                             | 0.9977                                         | 0.998                                         | 1.000                                          | 0.943                            | 0.122                               | 0.985                             | 0.599                                          | 0.987                                         | 0.988                                          | 0.140                            | 0.086                               | 0.310                             | 0.005                                          | 0.931                                         | 0.988                                          |
| AUC                   | 0.3422                           | 0.3558                              | 0.397                             | 0.3923                                         | 0.977                                         | 0.974                                          | 0.457                            | 0.228                               | 0.820                             | 0.695                                          | 0.930                                         | 0.960                                          | 0.334                            | 0.401                               | 0.219                             | 0.495                                          | 0.890                                         | 0.960                                          |
| KAPPA                 | -0.3150                          | -0.2928                             | -0.206                            | -0.2150                                        | 0.952                                         | 0.948                                          | -0.090                           | -0.070                              | 0.650                             | 0.545                                          | 0.901                                         | 0.932                                          | -0.129                           | -0.075                              | -0.234                            | -0.004                                         | 0.825                                         | 0.932                                          |
| Evaluation Metrics    | Pores                            |                                     |                                   |                                                |                                               |                                                | Celestite                        |                                     |                                   |                                                |                                               |                                                |                                  |                                     |                                   |                                                |                                               |                                                |
|                       | Model A                          | Model B                             | Model C                           | Model D                                        | Model E                                       | Model RF                                       | Model A                          | Model B                             | Model C                           | Model D                                        | Model E                                       | Model RF                                       |                                  |                                     |                                   |                                                |                                               |                                                |
|                       | Patch=16<br>Stride=1             | Patch=16<br>Stride=0.5              | Patch=16<br>Stride=1              | Patch=16<br>Stride=1                           | Patch=16<br>Stride=1                          | Patch=16<br>Stride=1                           | Patch=16<br>Stride=1             | Patch=16<br>Stride=0.5              | Patch=16<br>Stride=1              | Patch=16<br>Stride=1                           | Patch=16<br>Stride=1                          | Patch=16<br>Stride=1                           |                                  |                                     |                                   |                                                |                                               |                                                |
| RECALL                | 0.155                            | 0.018                               | 1.000                             | 0.712                                          | 0.968                                         | 0.895                                          | 0.000                            | 0.000                               | 0.000                             | 0.000                                          | 0.000                                         | 0.705                                          |                                  |                                     |                                   |                                                |                                               |                                                |
| SPECIFICITY           | 0.131                            | 0.933                               | 0.161                             | 0.004                                          | 0.997                                         | 0.994                                          | 1.000                            | 1.000                               | 1.000                             | 0.963                                          | 1.000                                         | 1.000                                          |                                  |                                     |                                   |                                                |                                               |                                                |
| ACCURACY              | 0.132                            | 0.822                               | 0.208                             | 0.090                                          | 0.995                                         | 0.983                                          | 0.997                            | 0.997                               | 0.878                             | 0.910                                          | 0.997                                         | 0.999                                          |                                  |                                     |                                   |                                                |                                               |                                                |
| DICE                  | 0.019                            | 0.024                               | 0.122                             | 0.160                                          | 0.957                                         | 0.924                                          | 0.000                            | 0.000                               | 0.000                             | 0.000                                          | 0.000                                         | 0.827                                          |                                  |                                     |                                   |                                                |                                               |                                                |
| IoU                   | 0.010                            | 0.012                               | 0.065                             | 0.087                                          | 0.918                                         | 0.858                                          | 0.000                            | 0.000                               | 0.000                             | 0.000                                          | 0.000                                         | 0.705                                          |                                  |                                     |                                   |                                                |                                               |                                                |
| VOLUMETRIC SIMILARITY | 0.125                            | 0.665                               | 0.122                             | 0.225                                          | 0.989                                         | 0.968                                          | 0.000                            | 0.000                               | 0.000                             | 0.777                                          | 0.000                                         | 0.827                                          |                                  |                                     |                                   |                                                |                                               |                                                |
| AUC                   | 0.143                            | 0.476                               | 0.581                             | 0.358                                          | 0.982                                         | 0.945                                          | 0.500                            | 0.500                               | 0.500                             | 0.481                                          | 0.500                                         | 0.852                                          |                                  |                                     |                                   |                                                |                                               |                                                |
| KAPPA                 | -0.094                           | -0.062                              | 0.021                             | -0.071                                         | 0.955                                         | 0.914                                          | 0.000                            | 0.000                               | 0.000                             | -0.045                                         | 0.000                                         | 0.826                                          |                                  |                                     |                                   |                                                |                                               |                                                |
